# Supplementary material
Source: publisher figshare collection journal article supplement (https://springernature.figshare.com/ndownloader/files/18233816)
Supplement: Supplementary file 1 [file 18233816]

## Sheet: SM_Table_6
Table S6. Clay weights paste and decoration distribution across sites
Site Gumelnita M. Jilava Sultana
Paste Decoration
Coarse Incision 1 0 0
Incision_Perforation 0 0 0
Incision_Impressions 0 0 0
Impressions 0 0 0
Undecorated 0 1 4
Fine Incision 7 0 2
Incision_Perforation 1 0 0
Incision_Impressions 1 0 1
Impressions 1 0 5
Undecorated 2 0 11
Semi-fine Incision 5 0 0
Incision_Perforation 0 0 0
Incision_Impressions 0 0 0
Impressions 2 0 0
Undecorated 1 6 13
